# Supplementary material
Source: PubMed Central journal article supplement (PMC4147982)
Supplement: ASN.2013090976_ASN2013090976SupplementaryData1.pdf [file ASN.2013090976_ASN2013090976SupplementaryData1.pdf]

## **MUTATIONS IN THE GENE THAT ENCODES THE F-ACTIN BINDING PROTEIN ANILLIN CAUSE FSGS**

\*Rasheed A. Gbadegesin<sup>1,3</sup>, Gentzon Hall<sup>2,3</sup>, Adebowale Adeyemo<sup>4</sup>, Nils Hanke<sup>5,10</sup>, Irini Tossidou<sup>5</sup>, James Burchette<sup>6</sup>, Guanghong Wu<sup>2,3</sup>, Alison Homstad<sup>1,3</sup>, Matthew A. Sparks<sup>2</sup>, Jose Gomez<sup>2</sup>, Ruiji Jiang<sup>1,3</sup>, Andrea Alonso<sup>1,3</sup>, Peter Lavin<sup>2,3,7</sup>, Peter Conlon<sup>8</sup>, Ron Korstanje<sup>9,10</sup>, M. Christine Stander<sup>11</sup>, Ghaidan Shamsan<sup>11</sup>, Moumita Barua<sup>12</sup>, Robert Spurney<sup>2</sup>, Pravin C. Singhal<sup>13</sup>, Jeffrey B. Kopp<sup>14</sup>, Hermann Haller<sup>5,10</sup>, David Howell<sup>6</sup>, Martin R. Pollak<sup>12</sup>, Andrey S. Shaw<sup>11</sup>, Mario Schiffer<sup>5,10</sup>, Michelle P. Winn<sup>2,3</sup>

## **SUPPLEMENTARY MATERIALS**

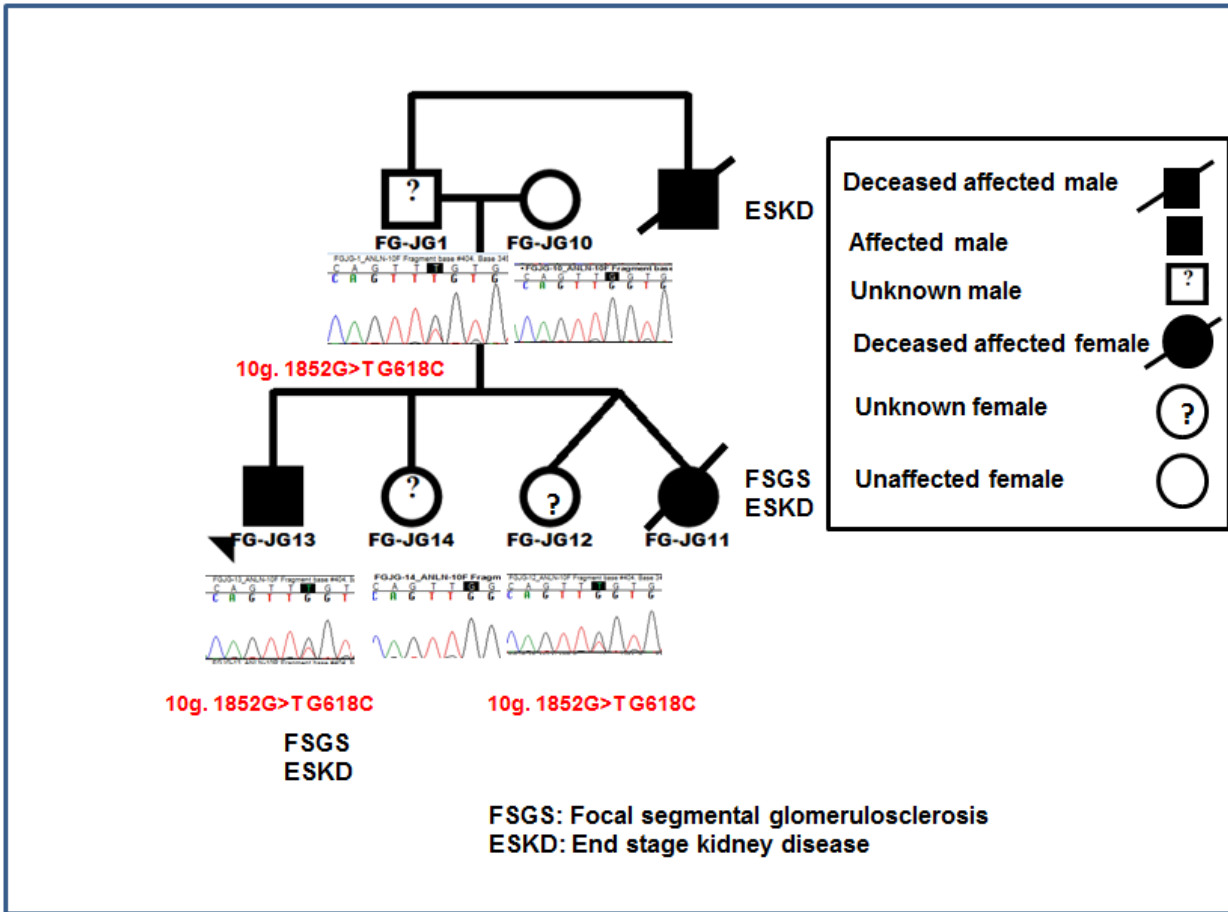

**Figure S1:** Pedigree and phenotype of second kindred with G618C mutation in *ANLN*.

**Supplementary Table 1: Variants with Minor allele frequency <1% in chromosomes 2p, 5p and 7p locus**

| <b>Locus</b>  | <b>Variant ID/ Nucleotide Change</b> | <b>Present in in-house controls Yes/No</b> | <b>Gene/Type of variant</b> |
|---------------|--------------------------------------|--------------------------------------------|-----------------------------|
| Chromosome 2p | 2_26526439_T/ G>T                    | Yes                                        | C2ORF39/ R527S              |
| Chromosome 2p | 2_27300747_A/ A>C                    | Yes                                        | CAD/ P380H                  |
| Chromosome 2p | 2_27583673_27583674_INS_A            | No                                         | GCKR/ Frame shift           |
| Chromosome 2p | 2_33598552_G/ G>A                    | No                                         | RASGRP3/ N68S               |
| Chromosome 2p | 2_39094611_A/ G>A                    | Yes                                        | SOS1/ P655L                 |
| Chromosome 5p | 5_1090778_A/ G>A                     | No                                         | NKD2/ V311I                 |
| Chromosome 7p | 7_25142786_C/ C>T                    | No                                         | C7ORF31/ H368R              |
| Chromosome 7p | 7_36417196_T/ C>T                    | No                                         | ANLN/ R431C missense        |
| Chromosome 7p | 7_44527869_A/ G>A                    | Yes                                        | NPC1L1/ P974S               |
| Chromosome 7p | 7_45684173_A/ G>A                    | No                                         | ADCY1/ E596K                |

**Supplementary Table 2: ANLN variants found in cohort of patients with FSGS**

| RS number    | Exon/Intron                | Nucleotide    | Amino Acid Change |
|--------------|----------------------------|---------------|-------------------|
| rs10215150   | Intron 2                   | (-)130C>G     | None              |
| rs79086052   | Intron 2                   | (-)153T>C     | None              |
| rs116131910  | 2                          | 100A>G        | M34V              |
| rs138687537  | 2                          | 143G>A        | S48N              |
| rs3735400    | 3                          | 194C>G        | S65W              |
| rs34285732   | 3                          | 434G>A        | R145H             |
| rs61737563   | 4                          | 553A>C        | None              |
| rs62873663   | 4                          | 554G>A        | R185K             |
| rs3735398    | 4                          | 819A>G        | None              |
| 1000 genomes | Intron 4                   | (+)25T>C      | None              |
| rs112558277  | 5                          | 884_883insCTT | S295SS            |
| rs61549495   | 5                          | 886_885insTCT | 296^295insS       |
| rs3801315    | Intron 5                   | (+)35T>C      | None              |
| rs11976268   | 6                          | 1245C>T       | None              |
| rs113329122  | Intron 7                   | (-)61G>A      | None              |
| rs10224902   | 8                          | 1506T>C       | None              |
| 1000 genomes | Intron 9                   | (-)27A>C      | None              |
| rs78667831   | Intron 9                   | (+)71A>G      | None              |
| New          | Intron 10                  | (-)50A>G      | None              |
| rs17170590   | Intron 10                  | (-)25G>A      | None              |
| rs17213431   | 10                         | 1857G>A       | None              |
| rs79624523   | Intron 13                  | (-24)T>C      | None              |
| rs138189874  | 13                         | 2193G>A       | None              |
| New          | 14                         | 2469G>C       | Q823H             |
| rs2302527    | Intron 15                  | (-91)A>G      | None              |
| New          | Intron 17                  | (-)4G>A       | None              |
| rs6957214    | Intron 19                  | (-)54T>C      | None              |
| rs78643563   | 19 (Splice site intronic)  | (-)3T>A       | None              |
| rs2052194    | 19 (Essential splice site) | (-)1G>A       | None              |
| 1000 genomes | Intron 23                  | (-)7A>G       | None              |
| rs2052197    | 24 (3 primer UTR)          | (+)3C>T       | None              |
| rs115284398  | 24 (3 primer UTR)          | (+)4G>A       | None              |

**Supplementary Table 3: ANLN exon primers**

| <b>Primer Name</b> | <b>Primer Sequence</b>     |
|--------------------|----------------------------|
| ANLN-1F            | CACTTTTCTCTTCCTGAATTTGAAC  |
| ANLN-1R            | TGACAGAGGAAGGTGGGTG        |
| ANLN-2F            | AAATTTGTGGCCGTAAAAATC      |
| ANLN-2R            | AATGAAATGTTTGGGGCTTG       |
| ANLN-3F            | TTTAAAAGAATAGGGAGGGGTG     |
| ANLN-3R            | ATGCAAGCAAAGGATACTCAAC     |
| ANLN-4F            | ATTCAGCATAGAGTGATCCTGGT    |
| ANLN-4R            | CCATCCACCTGCACATACAC       |
| ANLN-5F            | GGACTTGAATTGTTTTGTTATAGGAC |
| ANLN-5R            | CAAATCATTGCTGTACCATTCA     |
| ANLN-6F            | CAAAGCATTTTGAAGCTGTAATG    |
| ANLN-6R            | GGCATCAGAACCCATTTTG        |
| ANLN-7F            | TCAGACAAGATTGGGCACAT       |
| ANLN-7R            | CGAAAAGTGACAGAGTTAATTGGA   |
| ANLN-8F            | CACTATCTCTTTGGTTCTAAGGAAAC |
| ANLN-8R            | AGAACAAACAAATCCAGCAAAG     |
| ANLN-9F            | AAGAGAGGACAGGTGTTCAGG      |
| ANLN-9R            | CCCTGTCAAAGTCAGTGAGG       |
| ANLN-10F           | TTGAAGCTGAAGATTTTCTTGG     |
| ANLN-10R           | AGGTCTGCAAATTCCTTG         |
| ANLN-11F           | GGAGAATTCATTGATTTTCACAGA   |
| ANLN-11R           | TGTCAATCTAAACCATGACCCTTA   |
| ANLN-12F           | GGATAGTGCTCAGTGTGTTGC      |
| ANLN-12R           | AGCTCACAGCCTAGTGCAAG       |
| ANLN-13F           | TTTTGGTGCATAGTCGAGAAAC     |
| ANLN-13R           | TCCACTGGAACAGATGACTAGG     |
| ANLN-14F           | TTTGCTCTCATTAGAAACAGTTACG  |
| ANLN-14R           | ACAATTCAATCTAGGTGAGGTTCA   |
| ANLN-15F           | TTTGTGTCTGGAAAGTTGATTTTAG  |
| ANLN-15R           | GTGCATAAGGCGTTTCAAAG       |
| ANLN-16.17F        | AAATATTTTGGACTTGCATTATAGGG |
| ANLN-16.17R        | AAATTGGAACATGAAACTGATCC    |
| ANLN-18.19F        | GGTTGGATAGTTTTACTTTCTGAGAC |
| ANLN-18.19R        | TGCAAGTGCTTAATTCCTTACC     |
| ANLN-20F           | TTCTACTGGGATGGGGTGAG       |
| ANLN-20R           | AAAAGCATTGTGGCATTTC        |
| ANLN-21F           | TGCTCTGTTTTCAAGTTGTAATAGTC |
| ANLN-21R           | AACAAGTCTGTATTTCAAAAATGG   |
| ANLN-22F           | CAGCATTTCATTGTTAGGACATTT   |
| ANLN-22R           | CAGAGGGAACATTTGCATGA       |
| ANLN-23F           | AAATGCTGCTTAATGCTTACTGAC   |
| ANLN-23R           | AGTGGTAAGTACATAGTGGGCAATC  |
| ANLN-24F           | TCCCTAGCAAGAGTACATGGG      |
| ANLN-24R           | TGCAATCAGTAAATCTGATGCTC    |

**Supplementary Table 4: Anillin CDNA primers**

| <b>Primer Name</b> | <b>Primer Sequence</b>    |
|--------------------|---------------------------|
| VP1.5-F            | GGACTTTCCAAAATGTCTG       |
| ANLNcdna-1R        | AGACACAGGACTTGGAGAAC      |
| ANLNcdna-2F        | ACGCTGTTCTGACAACACTGA     |
| ANLNcdna-2R        | TCCCTTTGGGAACAGAATGT      |
| ANLNcdna-3F        | ATTTGCTCCTGGGAAGATGA      |
| ANLNcdna-3R        | GGATGGCCTTTGTATTTGGA      |
| ANLNcdna-4F        | TCTGCAATCTCAATCTAAAGACAAA |
| ANLNcdna-4R        | ACTGAGTTTTTTGAAACACCTTGG  |
| ANLNcdna-5F        | GAAAAAGGCGGAAACTCAA       |
| ANLNcdna-5R        | GTGCCAATGGTGCAAGTAA       |
| ANLNcdna-6F        | AGCCAAGAGGAGATGGATCA      |
| ANLNcdna-6R        | AAAGTGTTCTCTTCCCAGTTGC    |
| ANLNcdna-7F        | TCTATCAAGCTAGCCAGGCTCT    |
| ANLNcdna-7R        | GTGAGGAGTCGCTTTGGAGT      |
| ANLNcdna-8F        | ACAGCTTGGTGCAAAGAAAG      |
| ANLNcdna-8R        | TGCATTGGCTGACAAGAGTC      |
| ANLNcdna-9F        | CGCAAGAATCCCATAGGAAG      |
| ANLNcdna-9R        | GTTGTTGATGGCGTGCAG        |
| ANLNcdna-10F       | CTTCTACCACTTCGGCACCT      |
| ANLNcdna-10R       | CCTAGTCAGACAAAATGATGCAA   |
